# Supplementary material for: Escherichia coli YmdB regulates biofilm formation independently of its role as an RNase III modulator
Source: PubMed Central journal article supplement (PMC4222554; doi:10.1186/1471-2180-13-266), 2013-11-24
Supplement: 1471-2180-13-266-S1.pdf [file 1471-2180-13-266-S1.pdf]

**Table S1. Strains and plasmids used in this study**

| Strains and plasmids   | Genotype                                                                                                                                         | Description and References                                                                |
|------------------------|--------------------------------------------------------------------------------------------------------------------------------------------------|-------------------------------------------------------------------------------------------|
| <b>Strains</b>         |                                                                                                                                                  |                                                                                           |
| BW25113                | <i>rrnB</i> <sub>T14</sub> $\Delta$ <i>lacZ</i> <sub>WJ16</sub> <i>hsdR</i> 514<br><i>ΔaraBAD</i> <sub>AH33</sub> <i>ΔrhaBAD</i> <sub>LD78</sub> | Wild-type strain [28]                                                                     |
| KSK001                 | BW25113 ( <i>rnc14::Tn10</i> )                                                                                                                   | [29]                                                                                      |
| KSK002                 | BW25113 ( <i>ΔymdB</i> )<br>(-Km <sup>R</sup> )                                                                                                  | Elimination of Km <sup>R</sup> cassette from Keio- <i>ΔymdB</i> (JW1032) [28]; This study |
| KSK003                 | BW25113 ( $\lambda$ SG30013)                                                                                                                     | Transcription, translation, and degradation of RpoS [31]                                  |
| KSK004                 | BW25113 ( <i>λrpoS'</i> - <i>lacZ</i> )                                                                                                          | This study                                                                                |
| KSK005                 | BW25113 ( <i>rnc14</i> ·Keio- <i>ΔrpoS</i> )                                                                                                     | This study                                                                                |
| Keio- <i>ΔrpoS</i>     | Keio collection; JW5437                                                                                                                          | [28]                                                                                      |
| RS8872                 | P90C <i>pnp'</i> - <i>lacZ</i>                                                                                                                   | [32]                                                                                      |
| RS8942                 | P90C <i>rnc14::Tn10 pnp'</i> - <i>lacZ</i>                                                                                                       | [32]                                                                                      |
| pCA24N (- <i>gfp</i> ) | LacI <sup>q</sup> , Cm <sup>R</sup> , - <i>gfp</i>                                                                                               | [29]                                                                                      |
| <b>Plasmids</b>        |                                                                                                                                                  |                                                                                           |
| ASKA- <i>ymdB</i> (-)  | ASKA (-) collection                                                                                                                              | [35]                                                                                      |
| ASKA- <i>rpoS</i> (-)  | ASKA (-) collection                                                                                                                              | [35]                                                                                      |
| pSP417                 | Cloning vector with a promoterless <i>lacZ</i>                                                                                                   | [26]                                                                                      |
| pKSK001                | pSP417- <i>rpoS</i> (-92 to +10)                                                                                                                 | <i>rpoS</i> transcriptional fusion: <i>rpoS'</i> - <i>lacZ</i> ; This study               |

**Table S2. List of primers used in this study**

| <b>qPCR analysis</b>                          |                                               |                                                    |
|-----------------------------------------------|-----------------------------------------------|----------------------------------------------------|
| <b>Primer</b>                                 | <b>Forward (5' to 3')</b>                     | <b>Reverse (5' to 3')</b>                          |
| <b>mltD</b>                                   | TTC ATT GGC GAC GAG CTA AA                    | ACA TCG TGG AGA TAG CTC TTA TTG                    |
| <b>pnp</b>                                    | CGA TAC CTT CCT GTT CCA CTA C                 | AGA CGA CCG TGA CCA ATT TC                         |
| <b>plsX</b>                                   | TTC CTG CGC AGT CAG TTA TC                    | TTG CGC TCG ACC TTC TTT                            |
| <b>ahpF</b>                                   | CAA GGA ACT GTT GGC TGA AAT C                 | TGG GTT GGT GAT CAG GAA AG                         |
| <b>yhdE</b>                                   | TCT GTA TTT AGC TTC CGG TTC TC                | CTC CTC AAT GCC CGT AAC AAT A                      |
| <b>pspB</b>                                   | AGT GAG CAG CAG CGA TTA G                     | CCT CCA GTT CGG ATG TTC TG                         |
| <b>pspA</b>                                   | GAT GAA GCA ATG GCT CGT TTC                   | AAC TGA TCG TCC AGC GAT TT                         |
| <b>pspD</b>                                   | AGG CAA GCT GGT ACT TCT TAC                   | TCG GCG AGC AAC TGA TTT                            |
| <b>pspC</b>                                   | TGG CGG GCA TTA ATC TCA ATA                   | CCA GGA TAC GCA CCA GTT T                          |
| <b>ahpC</b>                                   | CTG GAG CGT CTT CTT CTT CTA C                 | GTA TAC GTC TAC GCC CAG TTT C                      |
| <b>rpoS</b>                                   | CAGAGCATCGTCAAATGGCTGTT                       | ATCTTCCAGTGTTGCCGCTTCGTA                           |
| <b>16S</b>                                    | GCT ACA ATG GCG CAT ACA AA                    | TTC ATG GAG TCG AGT TGC AG                         |
| <b>DNA sequencing, colony PCR, or cloning</b> |                                               |                                                    |
| <b>Primer</b>                                 | <b>Sequence (5' to 3')</b>                    | <b>Purpose</b>                                     |
| <b>pCA24N_F</b>                               | GAT AAC AAT TTC ACA CAG AAT TCA<br>TTA AAG AG | Confirmation of ASKA clones                        |
| <b>pSP417-<br/>rpoS_F</b>                     | <u>GGAATT</u> CGC CGA AAT GCC ATT ACC         | Construction of <i>rpoS</i> transcriptional fusion |
| <b>pSP417-<br/>rpoS_R</b>                     | CGG <u>GAT CCT</u> TCA CCC GAA GAC TC         | Construction of <i>rpoS</i> transcriptional fusion |
| <b>LacZ+139</b>                               | GGG CCT CTT CGC TAT TAC GC                    | Sequencing of pSP417- <i>rpoS</i>                  |
| <b>rpoS_F</b>                                 | CCC ATA ACG ACA CAA TGC TG                    | Confirmation of Keio- <i>rpoS</i>                  |
| <b>rpoS_R</b>                                 | TAT CTG GGG TTG TCG GTA GC                    | Confirmation of Keio- <i>rpoS</i>                  |
| <b>ymdB_F</b>                                 | CAA GAA GGT GTA AGG AGG CGT                   | Confirmation of Keio- <i>ymdB</i> or $\Delta ymdB$ |
| <b>ymdB_R</b>                                 | GCG TAT GCT CTG CCA TTT CG                    | Confirmation of Keio- <i>ymdB</i> or $\Delta ymdB$ |

Underlined sequences are restriction enzyme sites.

**Table S3. Differential gene expression profiles of 129 *E. coli* genes.** Genes showing a >1.5- or <0.6-fold change in expression in YmdB overexpressing cells are listed. Known RNase III targets from tiling array analysis [34] are marked as either purple (indicating a correlation with microarray data), or green (no correlation) [34]. Customized microarray IDs, HCL (hierarchical clustering) numbers, locus tag numbers, and gene product information are indicated.

| Custom ID | HCL | Gene        | Locus_tag    | ASKA-ymdB / pCA24N | P value | Gene Product                                        |
|-----------|-----|-------------|--------------|--------------------|---------|-----------------------------------------------------|
| 825982    | 19  | <i>pspB</i> | b1305        | 5.18               | 0.00    | DNA-binding transcriptional regulator of <i>psp</i> |
| 825984    | 22  | <i>pspA</i> | b1304        | 4.46               | 0.01    | regulatory protein for phage-shock-protein          |
| 825995    | 21  | <i>pspD</i> | b1307        | 4.30               | 0.00    | peripheral inner membrane phage-shock protein       |
| 825997    | 23  | <i>pspC</i> | b1306        | 3.86               | 0.01    | DNA-binding transcriptional activator               |
| 822955    | 24  | <i>mltD</i> | <b>b0211</b> | 3.66               | 0.01    | predicted membrane-bound lytic murein               |
| 831149    | 16  | <i>pnp</i>  | <b>b3164</b> | 3.06               | 0.01    | polynucleotide phosphorylase/polyadenylase          |
| 825379    | 17  | <i>plsX</i> | <b>b1090</b> | 3.01               | 0.00    | fatty acid/phospholipid synthesis protein           |
| 824049    | 18  | <i>ahpC</i> | b0605        | 2.81               | 0.00    | alkyl hydroperoxide reductase, C22 subunit          |
| 824058    | 14  | <i>ahpF</i> | <b>b0606</b> | 2.48               | 0.02    | alkyl hydroperoxide reductase, F52a subunit,        |
| 827136    | 12  | <i>pheS</i> | <b>b1714</b> | 2.34               | 0.01    | phenylalanine tRNA synthetase, alpha subunit        |
| 830188    | 8   | <i>ygdI</i> | b2809        | 2.29               | 0.01    | predicted protein                                   |
| 829604    | 11  | <i>rpoE</i> | b2573        | 2.28               | 0.02    | RNA polymerase, sigma 24 (sigma E) factor           |
| 834457    | 7   | <i>fhuF</i> | <b>b4367</b> | 2.27               | 0.01    | ferric iron reductase involved in ferric            |
| 831414    | 10  | <i>yhdE</i> | <b>b3248</b> | 2.26               | 0.03    | conserved protein                                   |
| 831390    | 9   | <i>rng</i>  | <b>b3247</b> | 2.25               | 0.02    | ribonuclease G                                      |
| 831138    | 2   | <i>nlpI</i> | <b>b3163</b> | 2.24               | 0.01    | conserved protein                                   |
| 826800    | 3   | <i>ynfM</i> | b1596        | 2.19               | 0.01    | predicted transporter                               |
| 830754    | 5   | <i>mqsR</i> | b3022        | 2.15               | 0.00    | predicted cyanide hydratase                         |
| 829565    | 1   | <i>rnc</i>  | <b>b2567</b> | 2.15               | 0.02    | RNase III                                           |
| 825385    | 6   | <i>fabH</i> | <b>b1091</b> | 2.13               | 0.01    | 3-oxoacyl-[acyl-carrier-protein] synthase III       |
| 829894    | 4   | <i>emrA</i> | b2685        | 2.12               | 0.02    | multidrug efflux system                             |
| 834252    | 37  | <i>fecI</i> | b4293        | 2.06               | 0.02    | KpLE2 phage-like element; RNA polymerase, sigma     |
| 829418    | 38  | <i>hisS</i> | <b>b2514</b> | 2.06               | 0.01    | histidyl tRNA synthetase                            |
| 822946    | 42  | <i>dnaE</i> | <b>b0184</b> | 2.01               | 0.04    | DNA polymerase III alpha subunit                    |
| 827292    | 41  | <i>pheT</i> | b1713        | 2.01               | 0.00    | phenylalanine tRNA synthetase, beta subunit         |
| 830742    | 40  | <i>exbB</i> | b3006        | 2.01               | 0.00    | membrane spanning protein in TonB-ExbB-ExbD         |
| 830220    | 39  | <i>csdA</i> | b2810        | 1.98               | 0.00    | cysteine sulfinate desulfinate                      |
| 825109    | 26  | <i>cspG</i> | b0990        | 1.94               | 0.03    | DNA-binding transcriptional regulator               |
| 824473    | 30  | <i>tolA</i> | <b>b0739</b> | 1.93               | 0.01    | membrane anchored protein in TolA-TolQ-TolR         |
| 824785    | 29  | <i>clpS</i> | b0881        | 1.92               | 0.01    | regulatory protein for ClpA substrate               |
| 833492    | 28  | <i>rpoC</i> | b3988        | 1.90               | 0.00    | RNA polymerase, beta prime subunit                  |

|        |    |             |              |      |      |                                                               |
|--------|----|-------------|--------------|------|------|---------------------------------------------------------------|
| 834473 | 27 | <i>yjzZ</i> | b4567        | 1.90 | 0.01 | predicted protein                                             |
| 829491 | 33 | <i>hscB</i> | <b>b2527</b> | 1.89 | 0.02 | DnaJ-like molecular chaperone specific for IscU               |
| 829583 | 31 | <i>rseB</i> | b2571        | 1.88 | 0.04 | anti-sigma factor                                             |
| 833418 | 32 | <i>rpoB</i> | b3987        | 1.87 | 0.02 | RNA polymerase, beta subunit                                  |
| 827102 | 34 | <i>pps</i>  | <b>b1702</b> | 1.87 | 0.00 | phosphoenolpyruvate synthase                                  |
| 829465 | 35 | <i>hscA</i> | <b>b2526</b> | 1.83 | 0.01 | DnaK-like molecular chaperone specific for IscU               |
| 823328 | 36 | <i>lacZ</i> | b0344        | 1.83 | 0.02 | beta-D-galactosidase                                          |
| 829610 | 45 | <i>rseA</i> | b2572        | 1.79 | 0.04 | anti-sigma factor                                             |
| 825414 | 44 | <i>fabD</i> | b1092        | 1.79 | 0.03 | malonyl-CoA-[acyl-carrier-protein] transacylase               |
| 826526 | 43 | <i>bdm</i>  | b1481        | 1.78 | 0.03 | biofilm-dependent modulation protein                          |
| 831205 | 56 | <i>yhbE</i> | b3184        | 1.75 | 0.01 | conserved inner membrane protein                              |
| 829176 | 46 | <i>cysU</i> | <b>b2424</b> | 1.75 | 0.05 | sulfate/thiosulfate transporter subunit                       |
| 827952 | 47 | <i>yoeB</i> | b4539        | 1.75 | 0.02 | toxin of the YoeB-YefM toxin-antitoxin system                 |
| 827610 | 48 | <i>torZ</i> | b1872        | 1.74 | 0.03 | trimethylamine N-oxide reductase system III,                  |
| 826101 | 57 | <i>ydaL</i> | b1340        | 1.73 | 0.01 | conserved protein                                             |
| 822817 | 58 | <i>fhuA</i> | <b>b0150</b> | 1.72 | 0.00 | ferrichrome outer membrane transporter                        |
| 824008 | 55 | <i>entE</i> | <b>b0594</b> | 1.72 | 0.02 | 2,3-dihydroxybenzoate-AMP ligase component of                 |
| 831573 | 54 | <i>rplC</i> | b3320        | 1.71 | 0.02 | 50S ribosomal subunit protein L3                              |
| 830208 | 53 | <i>ygdK</i> | b2811        | 1.70 | 0.03 | predicted Fe-S metabolism protein                             |
| 826315 | 61 | <i>ydbA</i> | b1405        | 1.70 | 0.04 | predicted outer membrane protein, C-ter fragment              |
| 826704 | 52 | <i>relE</i> | b1563        | 1.70 | 0.01 | Qin prophage; toxin of the RelE-RelB                          |
| 831594 | 49 | <i>rplD</i> | b3319        | 1.68 | 0.02 | 50S ribosomal subunit protein L4                              |
| 831167 | 60 | <i>nusA</i> | b3169        | 1.68 | 0.03 | transcription termination/antitermination L                   |
| 829065 | 59 | <i>ypeC</i> | b2390        | 1.68 | 0.05 | conserved protein                                             |
| 829568 | 50 | <i>rseC</i> | b2570        | 1.68 | 0.01 | RseC protein involved in reduction of the SoxR                |
| 829453 | 51 | <i>fdx</i>  | b2525        | 1.67 | 0.01 | [2Fe-2S] ferredoxin                                           |
| 829068 | 68 | <i>mntH</i> | b2392        | 1.65 | 0.03 | manganese/divalent cation transporter                         |
| 829398 | 71 | <i>yfgJ</i> | b2510        | 1.65 | 0.01 | predicted protein                                             |
| 826698 | 62 | <i>cspB</i> | b1557        | 1.65 | 0.03 | Qin prophage; cold shock protein                              |
| 824907 | 69 | <i>mukF</i> | b0922        | 1.64 | 0.03 | Involved in chromosome partitioning, Ca <sup>2+</sup> binding |
| 824394 | 74 | <i>tolR</i> | b0738        | 1.64 | 0.01 | membrane spanning protein in TolA-TolQ-TolR                   |
| 828387 | 67 | <i>cirA</i> | <b>b2155</b> | 1.64 | 0.03 | ferric iron-catecholate outer membrane                        |
| 829439 | 73 | <i>yfhJ</i> | b2524        | 1.64 | 0.01 | conserved protein                                             |
| 829456 | 64 | <i>iscA</i> | b2528        | 1.64 | 0.06 | FeS cluster assembly protein                                  |
| 827946 | 72 | <i>yeeE</i> | <b>b2013</b> | 1.64 | 0.00 | predicted inner membrane protein                              |
| 822625 | 82 | <i>fisQ</i> | <b>b0093</b> | 1.63 | 0.00 | membrane anchored protein involved in growth of               |
| 824002 | 63 | <i>entC</i> | <b>b0593</b> | 1.62 | 0.04 | isochorismate synthase 1                                      |
| 824883 | 70 | <i>rpsA</i> | b0911        | 1.62 | 0.02 | 30S ribosomal subunit protein S1                              |
| 831576 | 79 | <i>rpoA</i> | <b>b3295</b> | 1.61 | 0.00 | RNA polymerase, alpha subunit                                 |
| 826000 | 81 | <i>ycjM</i> | b1309        | 1.61 | 0.01 | predicted glucosyltransferase                                 |

|        |      |             |              |      |      |                                                  |
|--------|------|-------------|--------------|------|------|--------------------------------------------------|
| 831164 | 80   | <i>yhbC</i> | b3170        | 1.61 | 0.00 | conserved protein                                |
| 824996 | 66   | <i>pqiB</i> | b0951        | 1.61 | 0.03 | paraquat-inducible protein B                     |
| 830244 | 77   | <i>ptr</i>  | b2821        | 1.60 | 0.01 | protease III                                     |
| 829050 | 25   | <i>yfdM</i> | b2356        | 1.60 | 0.20 | CPS-53 (KpLE1) prophage; predicted               |
| 831472 | 76   | <i>yhdL</i> | b4550        | 1.60 | 0.01 | conserved protein                                |
| 833839 | 65   | <i>proP</i> | b4111        | 1.59 | 0.03 | proline/glycine betaine transporter              |
| 831495 | 75   | <i>rpsK</i> | <b>b3297</b> | 1.59 | 0.00 | 30S ribosomal subunit protein S11                |
| 823974 | 78   | <i>fepA</i> | <b>b0584</b> | 1.59 | 0.02 | iron-enterobactin outer membrane transporter     |
| 829571 | 93   | <i>iscU</i> | b2529        | 1.55 | 0.03 | scaffold protein                                 |
| 830028 | 85   | <i>truD</i> | b2745        | 1.54 | 0.02 | pseudouridine synthase                           |
| 832252 | 84   | <i>bax</i>  | <b>b3570</b> | 1.54 | 0.04 | conserved protein                                |
| 829589 | 89   | <i>lepA</i> | <b>b2569</b> | 1.52 | 0.03 | GTP-binding membrane protein                     |
| 831579 | 87   | <i>rpsJ</i> | b3321        | 1.52 | 0.01 | 30S ribosomal subunit protein S10                |
| 829430 | 94   | <i>yfgM</i> | <b>b2513</b> | 1.52 | 0.01 | conserved protein                                |
| 829194 | 86   | <i>yfeS</i> | b2420        | 1.52 | 0.02 | conserved protein                                |
| 828005 | 88   | <i>yeeZ</i> | b2016        | 1.52 | 0.01 | predicted epimerase, with NAD(P)-binding         |
| 825796 | 95   | <i>yehS</i> | b1228        | 1.51 | 0.02 | predicted protein                                |
| 826886 | 90   | <i>rsxA</i> | <b>b1627</b> | 1.51 | 0.04 | predicted inner membrane subunit                 |
| 824397 | 100  | <i>tolB</i> | b0740        | 1.51 | 0.01 | periplasmic protein                              |
| 830751 | 99   | <i>ygiT</i> | b3021        | 1.51 | 0.01 | predicted DNA-binding transcriptional regulator  |
| 823314 | 92   | <i>lacI</i> | b0345        | 1.50 | 0.03 | DNA-binding transcriptional repressor            |
| 831873 | 2453 | <i>glgC</i> | b3430        | 0.60 | 0.01 | glucose-1-phosphate adenylyltransferase          |
| 822826 | 2466 | <i>sfsA</i> | b0146        | 0.60 | 0.05 | predicted DNA-binding transcriptional regulator  |
| 825036 | 2454 | <i>pflB</i> | <b>b0903</b> | 0.59 | 0.00 | pyruvate formate lyase I                         |
| 832662 | 2449 | <i>tnaA</i> | <b>b3708</b> | 0.59 | 0.01 | tryptophanase/L-cysteine desulfhydrase,          |
| 824169 | 2464 | <i>ybeL</i> | b0643        | 0.59 | 0.04 | conserved protein                                |
| 833534 | 2450 | <i>malE</i> | <b>b4034</b> | 0.59 | 0.01 | maltose transporter subunit                      |
| 829912 | 2451 | <i>srlR</i> | b2707        | 0.59 | 0.00 | DNA-binding transcriptional repressor            |
| 829427 | 2448 | <i>sseA</i> | b2521        | 0.59 | 0.04 | 3-mercaptopyruvate sulfurtransferase             |
| 829667 | 2421 | <i>clpB</i> | <b>b2592</b> | 0.58 | 0.03 | protein disaggregation chaperone                 |
| 825513 | 2422 | <i>icd</i>  | b1136        | 0.58 | 0.01 | e14 prophage; isocitrate dehydrogenase, specific |
| 830994 | 2419 | <i>exuT</i> | b3093        | 0.57 | 0.04 | hexuronate transporter                           |
| 829906 | 2420 | <i>gutM</i> | b2706        | 0.56 | 0.02 | DNA-binding transcriptional activator of         |
| 827411 | 2418 | <i>manX</i> | <b>b1817</b> | 0.55 | 0.00 | fused mannose-specific PTS enzymes: IIA          |
| 831841 | 2417 | <i>malP</i> | <b>b3417</b> | 0.55 | 0.01 | maltodextrin phosphorylase                       |
| 830921 | 2413 | <i>ygjR</i> | b3087        | 0.55 | 0.02 | predicted NAD(P)-binding dehydrogenase           |
| 830730 | 2416 | <i>hybO</i> | <b>b2997</b> | 0.54 | 0.02 | hydrogenase 2, small subunit                     |
| 831040 | 2415 | <i>tdcC</i> | b3116        | 0.54 | 0.01 | L-threonine/L-serine transporter                 |
| 830585 | 2414 | <i>ansB</i> | <b>b2957</b> | 0.54 | 0.02 | periplasmic L-asparaginase II                    |
| 833677 | 2423 | <i>malK</i> | <b>b4035</b> | 0.52 | 0.00 | fused maltose transport subunit, ATP-binding     |

|        |      |             |              |      |      |                                                  |
|--------|------|-------------|--------------|------|------|--------------------------------------------------|
| 824954 | 2426 | <i>ompF</i> | <b>b0929</b> | 0.51 | 0.01 | outer membrane porin 1a (Ia;b;F)                 |
| 829747 | 2425 | <i>yfiA</i> | <b>b2597</b> | 0.51 | 0.00 | cold shock protein associated with 30S ribosomal |
| 832241 | 2424 | <i>dppA</i> | b3544        | 0.51 | 0.03 | dipeptide transporter                            |
| 824400 | 2427 | <i>sucD</i> | b0729        | 0.50 | 0.01 | succinyl-CoA synthetase, NAD(P)-binding, alpha   |
| 824351 | 2431 | <i>sucC</i> | b0728        | 0.48 | 0.02 | succinyl-CoA synthetase, beta subunit            |
| 834098 | 2430 | <i>treB</i> | <b>b4240</b> | 0.48 | 0.01 | fused trehalose(maltose)-specific PTS enzyme:    |
| 825844 | 2429 | <i>ompW</i> | <b>b1256</b> | 0.47 | 0.03 | outer membrane protein W                         |
| 829903 | 2428 | <i>srlD</i> | b2705        | 0.46 | 0.00 | sorbitol-6-phosphate dehydrogenase               |
| 829900 | 2411 | <i>srlB</i> | b2704        | 0.45 | 0.01 | glucitol/sorbitol-specific enzyme IIA component  |
| 824360 | 2412 | <i>sucB</i> | <b>b0727</b> | 0.45 | 0.01 | dihydrolypoyltranssuccinase                      |
| 831015 | 2409 | <i>tdcB</i> | b3117        | 0.44 | 0.00 | catabolic threonine dehydratase, PLP-dependent   |
| 824363 | 2410 | <i>sucA</i> | b0726        | 0.43 | 0.01 | 2-oxoglutarate decarboxylase, thiamin-requiring  |
| 833644 | 2407 | <i>nrfA</i> | b4070        | 0.43 | 0.01 | nitrite reductase, formate-dependent,            |
| 829891 | 2408 | <i>srlE</i> | b2703        | 0.42 | 0.01 | glucitol/sorbitol-specific enzyme IIB component  |
| 829880 | 2406 | <i>srlA</i> | b2702        | 0.39 | 0.00 | glucitol/sorbitol-specific enzyme IIC component  |
| 825817 | 2405 | <i>adhE</i> | <b>b1241</b> | 0.27 | 0.01 | fused acetaldehyde-CoA                           |

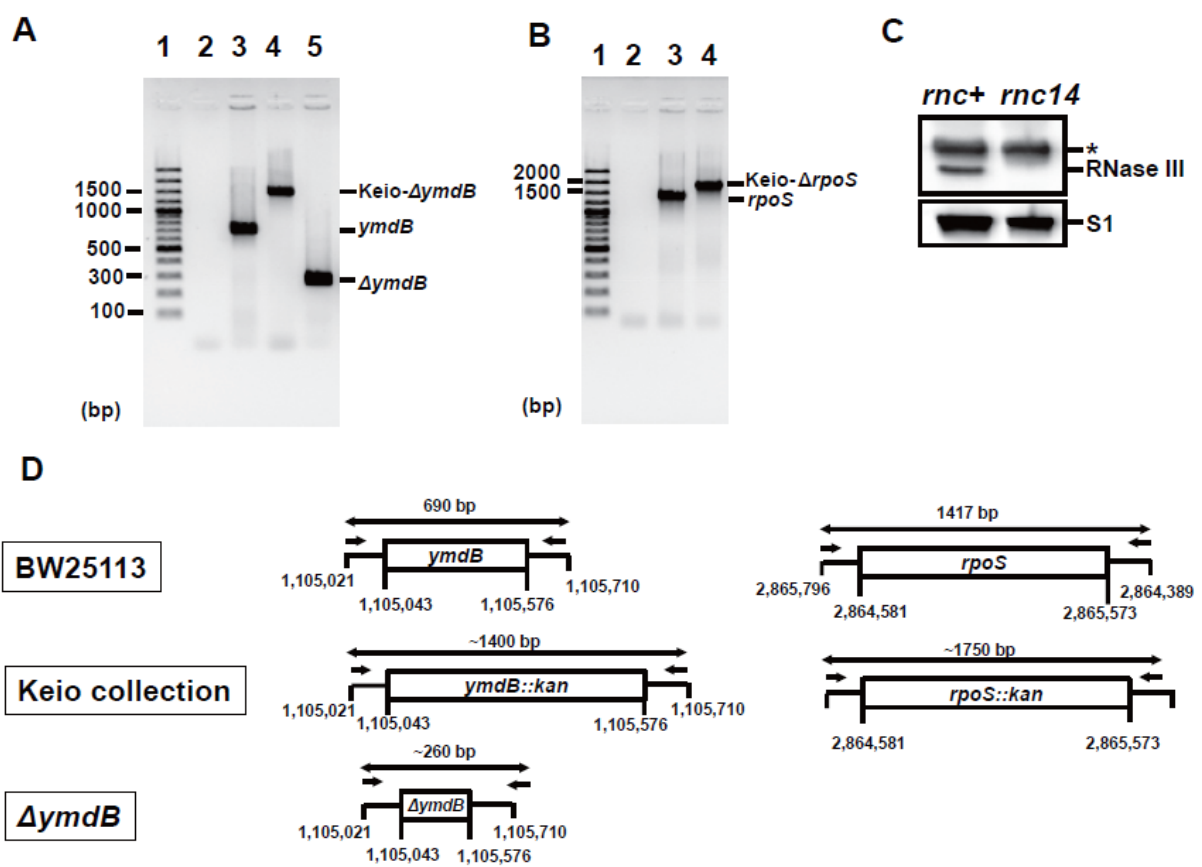

Figure S1. Kim et al.

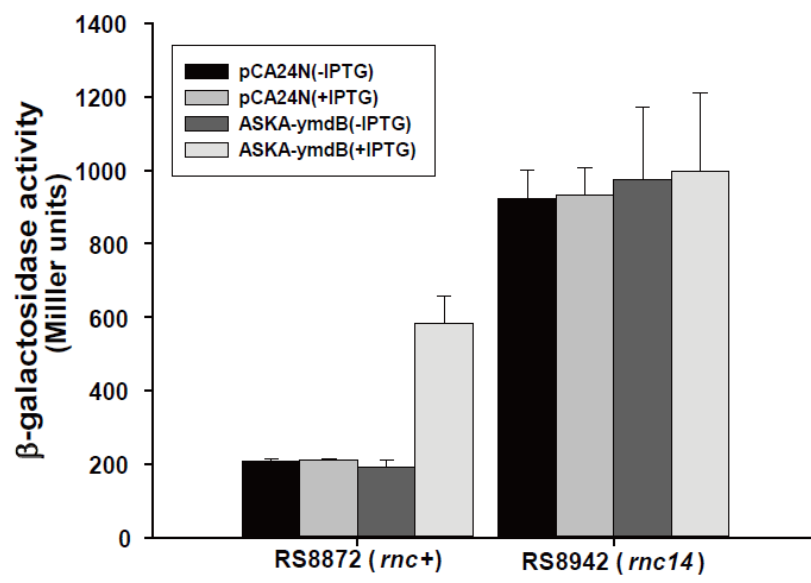

Figure S2. Kim et al.



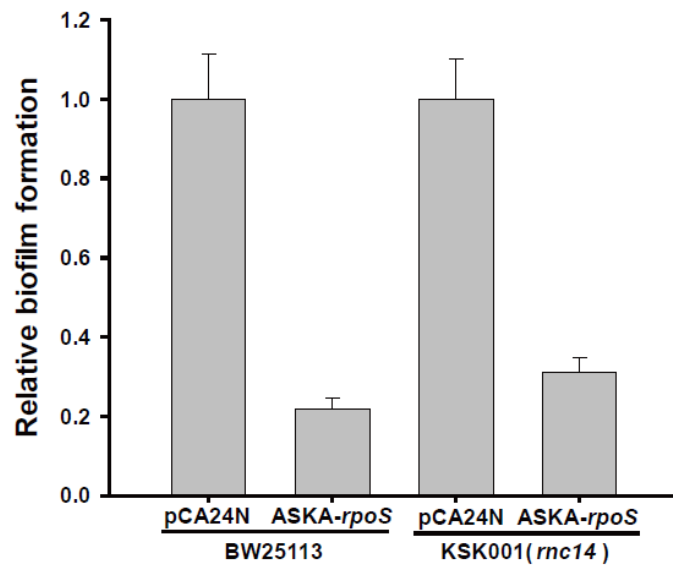

Figure S3. Kim et al.

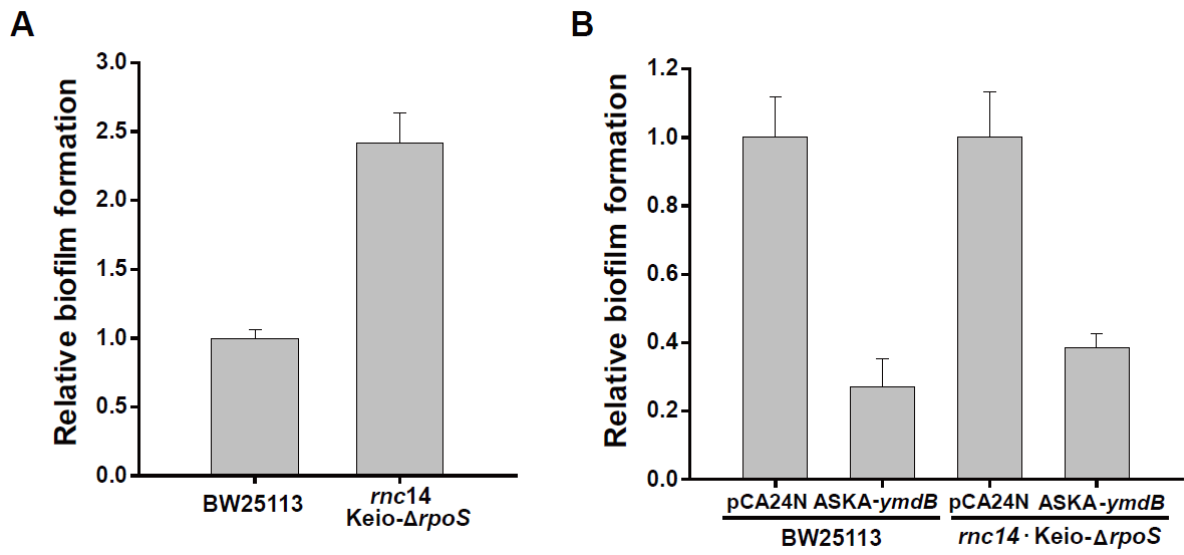

Figure S4. Kim et al.

## Figure Legends

**Figure S1. Verification of *rpoS*, *ymdB*, and *rnc* mutants.** PCR-validation of (A) Keio- $\Delta$ *rpoS* or (B) Keio- $\Delta$ *ymdB* and  $\Delta$ *ymdB*. Colonies of BW25113, Keio- $\Delta$ *rpoS*, Keio- $\Delta$ *ymdB*, KSK002 ( $\Delta$ *ymdB*), or KSK005 (*rnc14*·Keio- $\Delta$ *rpoS*) were amplified using Emerald PCR premix (Takara) and *rpoS*\_F/*rpoS*\_R or *ymdB*\_F/*ymdB*\_R primer sets. Aliquots were resolved in 1.5% agarose gels (Lane 1: 100 bp Plus DNA Ladder (Fermentas), Lane 2: primer pair, lane 3: BW25113, lane 4: Keio- $\Delta$ *rpoS* or Keio- $\Delta$ *ymdB*, lane 5:  $\Delta$ *ymdB* or *rnc14*·Keio- $\Delta$ *rpoS*), and photographed using a GelDoc system (E-Graph, ATTO). Bp, base pairs. (C) Schematic representations of PCR regions. The amplified regions of each gene within chromosome MG1655 (GenBank U00096.2) are shown at the bottom of each figure (not to scale). (D) Western-blot analysis verifying RNase III mutation. BW25113 (*rnc*+), KSK001 (*rnc14*::*Tn10* in BW25113), or KSK005 (*rnc14*·Keio-*rpoS*) cells were grown to OD<sub>600</sub>=1.0, harvested, and challenged with anti-RNase III or anti-S1. Asterisk (\*) indicates non-specific binding by anti-RNase III, as described previously [17].

**Figure S2. Dependency of YmdB-mediated down-regulation of RNase III activity upon the presence of RNase III.** RNase III activity was assessed according to  $\beta$ -galactosidase activity resulting from the *pnp*'-*lacZ* fusion in RS8872 (*rnc*+) or RS8942 (*rnc14*::*Tn10*) cells containing either pCA24N (-*gfp*) or ASKA-*ymdB* (-). Mean values (n>3) with standard deviations are shown.

**Figure S3. Interdependency of RpoS and RNase III for biofilm formation.** Effect of biofilm formation by RpoS was measured in both wild type (BW25113: *rnc*+) and KSK001 (BW25113: *rnc14*::*Tn10*) containing either pCA24N (-*gfp*) or ASKA-*ymdB* (-) were grown in LB complemented with IPTG (0.1 mM final) and chloramphenicol at 37°C for 24 h. The data shown in the figure are the mean values and errors from n=10.

**Figure S4. Dependency of YmdB-mediated phenotype upon the absence of RpoS and RNase III.** (A) The effect of biofilm formation by double mutation of RpoS and RNase III. Biofilm formation in both wild type (BW25113: *rnc*+*rpoS*+) and *rnc14*- $\Delta$ *rpoS* double mutant (KSK005: *rnc14*·Keio- $\Delta$ *rpoS*) was measured. (B) Effect of YmdB overexpression in double mutation of *rnc14*- $\Delta$ *rpoS*. BW25113 or KSK005 cells containing either pCA24N (-*gfp*) or ASKA-*ymdB* (-) were grown in LB complemented with IPTG (0.1 mM final) and chloramphenicol at 37°C for 24 h. Biofilm measurements were performed as described in Methods and the mean values and errors from multiple experiments (n=10) are shown.
